# Supplementary material
Source: publisher figshare collection journal article supplement (https://acs.figshare.com/ndownloader/files/3968491)
Supplement: Supplementary file 1 [file 3968491]

#BEGIN
data_pdmnt1112
 
_audit_creation_method            SHELXL-97
_chemical_name_systematic
;
 ?
;
_chemical_name_common             ?
_chemical_melting_point           ?
_chemical_formula_moiety          'C26 H32 N8 Pd2 S8'
_chemical_formula_sum
 'C26 H32 N8 Pd2 S8'
_chemical_formula_weight          925.88
 
loop_
 _atom_type_symbol
 _atom_type_description
 _atom_type_scat_dispersion_real
 _atom_type_scat_dispersion_imag
 _atom_type_scat_source
 'C'  'C'   0.0033   0.0016
 'International Tables Vol C Tables 4.2.6.8 and 6.1.1.4'
 'H'  'H'   0.0000   0.0000
 'International Tables Vol C Tables 4.2.6.8 and 6.1.1.4'
 'N'  'N'   0.0061   0.0033
 'International Tables Vol C Tables 4.2.6.8 and 6.1.1.4'
 'S'  'S'   0.1246   0.1234
 'International Tables Vol C Tables 4.2.6.8 and 6.1.1.4'
 'Pd'  'Pd'  -0.9988   1.0072
 'International Tables Vol C Tables 4.2.6.8 and 6.1.1.4'
 
_symmetry_cell_setting            Triclinic
_symmetry_space_group_name_H-M    P-1
 
loop_
 _symmetry_equiv_pos_as_xyz
 'x, y, z'
 '-x, -y, -z'
 
_cell_length_a                    8.957(3)
_cell_length_b                    9.332(3)
_cell_length_c                    24.143(7)
_cell_angle_alpha                 89.521(4)
_cell_angle_beta                  87.520(4)
_cell_angle_gamma                 66.342(4)
_cell_volume                      1846.6(10)
_cell_formula_units_Z             2
_cell_measurement_temperature     293(2)
_cell_measurement_reflns_used     5791
_cell_measurement_theta_min       0.84
_cell_measurement_theta_max       23.31
 
_exptl_crystal_description        plate
_exptl_crystal_colour             'dark green'
_exptl_crystal_size_max           0.18
_exptl_crystal_size_mid           0.14
_exptl_crystal_size_min           0.03
_exptl_crystal_density_meas       ?
_exptl_crystal_density_diffrn     1.665
_exptl_crystal_density_method     'not measured'
_exptl_crystal_F_000              928
_exptl_absorpt_coefficient_mu     1.457
_exptl_absorpt_correction_type    multi-scan
_exptl_absorpt_correction_T_min   0.797
_exptl_absorpt_correction_T_max   1.000
_exptl_absorpt_process_details    'SADABS'
 
_exptl_special_details
;
 ?
;
 
_diffrn_ambient_temperature       293(2)
_diffrn_radiation_wavelength      0.71073
_diffrn_radiation_type            MoK\a
_diffrn_radiation_source          'fine-focus sealed tube'
_diffrn_radiation_monochromator   graphite
_diffrn_measurement_device_type   'Bruker Smart APEXII CCD'
_diffrn_measurement_method        'theta & omega scan'
_diffrn_detector_area_resol_mean  ?
_diffrn_standards_number          ?
_diffrn_standards_interval_count  ?
_diffrn_standards_interval_time   ?
_diffrn_standards_decay_%         none
_diffrn_reflns_number             16722
_diffrn_reflns_av_R_equivalents   0.1378
_diffrn_reflns_av_sigmaI/netI     0.1450
_diffrn_reflns_limit_h_min        -9
_diffrn_reflns_limit_h_max        9
_diffrn_reflns_limit_k_min        -10
_diffrn_reflns_limit_k_max        10
_diffrn_reflns_limit_l_min        -26
_diffrn_reflns_limit_l_max        26
_diffrn_reflns_theta_min          0.84
_diffrn_reflns_theta_max          23.31
_reflns_number_total              5303
_reflns_number_gt                 2622
_reflns_threshold_expression      >2sigma(I)
 
_computing_data_collection        'Smart'
_computing_cell_refinement        'Saint'
_computing_data_reduction         'Saint'
_computing_structure_solution     'Sir2004'
_computing_structure_refinement   'SHELXL-97 (Sheldrick, 1997)'
_computing_molecular_graphics     ?
_computing_publication_material   ?
 
_refine_special_details
;
 Refinement of F^2^ against ALL reflections.  The weighted R-factor wR and
 goodness of fit S are based on F^2^, conventional R-factors R are based
 on F, with F set to zero for negative F^2^. The threshold expression of
 F^2^ > 2sigma(F^2^) is used only for calculating R-factors(gt) etc. and is
 not relevant to the choice of reflections for refinement.  R-factors based
 on F^2^ are statistically about twice as large as those based on F, and R-
 factors based on ALL data will be even larger.
 The crystals were of good quality but were very thin plates and diffracted
 poorly.
;
 
_refine_ls_structure_factor_coef  Fsqd
_refine_ls_matrix_type            full
_refine_ls_weighting_scheme       calc
_refine_ls_weighting_details
 'calc w=1/[\s^2^(Fo^2^)+(0.0003P)^2^+0.0000P] where P=(Fo^2^+2Fc^2^)/3'
_atom_sites_solution_primary      direct
_atom_sites_solution_secondary    difmap
_atom_sites_solution_hydrogens    geom
_refine_ls_hydrogen_treatment     constr
_refine_ls_extinction_method      none
_refine_ls_extinction_coef        ?
_refine_ls_number_reflns          5303
_refine_ls_number_parameters      401
_refine_ls_number_restraints      0
_refine_ls_R_factor_all           0.1451
_refine_ls_R_factor_gt            0.0596
_refine_ls_wR_factor_ref          0.0963
_refine_ls_wR_factor_gt           0.0783
_refine_ls_goodness_of_fit_ref    1.002
_refine_ls_restrained_S_all       1.002
_refine_ls_shift/su_max           0.000
_refine_ls_shift/su_mean          0.000
 
loop_
 _atom_site_label
 _atom_site_type_symbol
 _atom_site_fract_x
 _atom_site_fract_y
 _atom_site_fract_z
 _atom_site_U_iso_or_equiv
 _atom_site_adp_type
 _atom_site_occupancy
 _atom_site_symmetry_multiplicity
 _atom_site_calc_flag
 _atom_site_refinement_flags
 _atom_site_disorder_assembly
 _atom_site_disorder_group
Pd2 Pd 0.06262(10) 0.19921(8) 0.19860(3) 0.0484(3) Uani 1 1 d . . .
Pd1 Pd 0.56714(10) 0.41304(9) 0.30410(3) 0.0550(3) Uani 1 1 d . . .
S22 S 0.6458(3) 0.2850(3) 0.38487(12) 0.0659(9) Uani 1 1 d . . .
S11 S 0.4848(4) 0.5407(3) 0.22138(12) 0.0686(9) Uani 1 1 d . . .
S13 S 0.0239(3) 0.3309(3) 0.28224(11) 0.0643(9) Uani 1 1 d . . .
S24 S 0.1195(3) 0.0699(3) 0.11626(11) 0.0624(9) Uani 1 1 d . . .
S12 S 0.5723(3) 0.6348(3) 0.34135(12) 0.0647(9) Uani 1 1 d . . .
S21 S 0.5602(4) 0.1883(3) 0.26600(12) 0.0774(10) Uani 1 1 d . . .
S23 S 0.1927(4) -0.0367(3) 0.24269(12) 0.0723(10) Uani 1 1 d . . .
S14 S -0.0802(3) 0.4279(3) 0.15580(11) 0.0611(8) Uani 1 1 d . . .
N21 N 0.6560(10) 0.1330(10) 0.1598(4) 0.060(3) Uani 1 1 d . . .
N12 N 0.7595(14) 0.3425(13) 0.5240(4) 0.096(4) Uani 1 1 d . . .
C63 C 0.2057(12) 0.3609(11) 0.3813(4) 0.064(3) Uani 1 1 d . . .
H63A H 0.1956 0.4248 0.3486 0.077 Uiso 1 1 calc R . .
H63B H 0.3034 0.3519 0.3996 0.077 Uiso 1 1 calc R . .
C43 C 0.2270(13) 0.0064(11) 0.4353(4) 0.066(3) Uani 1 1 d . . .
H43A H 0.1902 0.0728 0.4681 0.080 Uiso 1 1 calc R . .
H43B H 0.2948 -0.0985 0.4470 0.080 Uiso 1 1 calc R . .
N23 N 0.1224(9) -0.0589(9) 0.3499(4) 0.051(2) Uani 1 1 d . . .
C11 C 0.4707(12) 0.3990(11) 0.1821(4) 0.046(3) Uani 1 1 d . . .
C51 C 0.3665(12) 0.2955(12) 0.1076(4) 0.062(3) Uani 1 1 d . . .
H51A H 0.2713 0.3377 0.0852 0.075 Uiso 1 1 calc R . .
H51B H 0.3497 0.2229 0.1336 0.075 Uiso 1 1 calc R . .
N24 N -0.2245(12) 0.5836(13) 0.0172(4) 0.101(4) Uani 1 1 d . . .
C31 C 0.6650(12) 0.1824(12) 0.1011(4) 0.067(3) Uani 1 1 d . . .
H31A H 0.7588 0.1034 0.0818 0.081 Uiso 1 1 calc R . .
H31B H 0.6811 0.2792 0.1009 0.081 Uiso 1 1 calc R . .
C13 C 0.1414(12) 0.1840(11) 0.3221(4) 0.047(3) Uani 1 1 d . . .
C14 C -0.0600(13) 0.3725(13) 0.0869(4) 0.061(3) Uani 1 1 d . . .
C53 C 0.3267(12) 0.0667(11) 0.3969(4) 0.059(3) Uani 1 1 d . . .
H53A H 0.3980 0.0974 0.4186 0.071 Uiso 1 1 calc R . .
H53B H 0.3946 -0.0163 0.3716 0.071 Uiso 1 1 calc R . .
C33 C 0.0800(12) 0.0040(11) 0.4068(4) 0.058(3) Uani 1 1 d . . .
H33A H 0.0355 -0.0595 0.4281 0.069 Uiso 1 1 calc R . .
H33B H -0.0036 0.1096 0.4057 0.069 Uiso 1 1 calc R . .
C42 C 0.6440(13) 0.6898(14) 0.4441(5) 0.071(4) Uani 1 1 d . . .
C32 C 0.7147(15) 0.3821(14) 0.4824(6) 0.069(4) Uani 1 1 d . . .
C22 C 0.6593(12) 0.4287(13) 0.4261(5) 0.064(3) Uani 1 1 d . . .
C44 C -0.1487(14) 0.4905(14) 0.0460(5) 0.064(3) Uani 1 1 d . . .
N13 N 0.2199(10) 0.2031(9) 0.3646(4) 0.050(2) Uani 1 1 d . . .
C21 C 0.5695(12) 0.2312(11) 0.1982(4) 0.050(3) Uani 1 1 d . . .
C24 C 0.0275(13) 0.2182(12) 0.0695(4) 0.062(3) Uani 1 1 d . . .
C23 C 0.1528(12) 0.0209(11) 0.3094(4) 0.052(3) Uani 1 1 d . . .
C81 C 0.7498(13) -0.0364(13) 0.1719(5) 0.086(4) Uani 1 1 d . . .
H81A H 0.8426 -0.0785 0.1458 0.103 Uiso 1 1 calc R . .
H81B H 0.7912 -0.0459 0.2088 0.103 Uiso 1 1 calc R . .
C93 C -0.0620(14) -0.1915(13) 0.3323(5) 0.112(5) Uani 1 1 d . . .
H93A H -0.1207 -0.1633 0.3675 0.168 Uiso 1 1 calc R . .
H93B H -0.0614 -0.2892 0.3198 0.168 Uiso 1 1 calc R . .
H93C H -0.1142 -0.1116 0.3058 0.168 Uiso 1 1 calc R . .
C73 C 0.0566(11) 0.4390(10) 0.4206(4) 0.070(3) Uani 1 1 d . . .
H73A H -0.0403 0.4513 0.4020 0.105 Uiso 1 1 calc R . .
H73B H 0.0503 0.5397 0.4319 0.105 Uiso 1 1 calc R . .
H73C H 0.0662 0.3749 0.4527 0.105 Uiso 1 1 calc R . .
C12 C 0.6253(11) 0.5773(13) 0.4083(4) 0.054(3) Uani 1 1 d . . .
N11 N 0.3784(10) 0.4260(9) 0.1395(3) 0.054(2) Uani 1 1 d . . .
C61 C 0.2822(14) 0.5905(12) 0.1202(4) 0.074(4) Uani 1 1 d . . .
H61A H 0.1813 0.5968 0.1051 0.088 Uiso 1 1 calc R . .
H61B H 0.2547 0.6621 0.1516 0.088 Uiso 1 1 calc R . .
N22 N 0.6581(12) 0.7826(11) 0.4719(5) 0.102(4) Uani 1 1 d . . .
C83 C 0.1119(13) -0.2081(11) 0.3384(4) 0.071(4) Uani 1 1 d . . .
H83A H 0.1597 -0.2799 0.3682 0.085 Uiso 1 1 calc R . .
H83B H 0.1751 -0.2528 0.3045 0.085 Uiso 1 1 calc R . .
C71 C 0.3772(14) 0.6373(12) 0.0775(5) 0.110(5) Uani 1 1 d . . .
H71A H 0.4727 0.6394 0.0934 0.165 Uiso 1 1 calc R . .
H71B H 0.3113 0.7395 0.0641 0.165 Uiso 1 1 calc R . .
H71C H 0.4092 0.5634 0.0473 0.165 Uiso 1 1 calc R . .
C41 C 0.5136(14) 0.2065(13) 0.0702(4) 0.080(4) Uani 1 1 d . . .
H41A H 0.5111 0.2650 0.0366 0.096 Uiso 1 1 calc R . .
H41B H 0.5137 0.1062 0.0600 0.096 Uiso 1 1 calc R . .
N14 N 0.0597(14) 0.1446(12) -0.0336(4) 0.102(4) Uani 1 1 d . . .
C34 C 0.0429(14) 0.1790(13) 0.0117(5) 0.070(4) Uani 1 1 d . . .
C91 C 0.6509(15) -0.1303(12) 0.1685(6) 0.133(6) Uani 1 1 d . . .
H91A H 0.5537 -0.0838 0.1918 0.199 Uiso 1 1 calc R . .
H91B H 0.7132 -0.2349 0.1806 0.199 Uiso 1 1 calc R . .
H91C H 0.6218 -0.1332 0.1308 0.199 Uiso 1 1 calc R . .
 
loop_
 _atom_site_aniso_label
 _atom_site_aniso_U_11
 _atom_site_aniso_U_22
 _atom_site_aniso_U_33
 _atom_site_aniso_U_23
 _atom_site_aniso_U_13
 _atom_site_aniso_U_12
Pd2 0.0516(6) 0.0347(5) 0.0537(6) 0.0013(4) -0.0036(5) -0.0117(4)
Pd1 0.0508(6) 0.0422(5) 0.0645(6) -0.0039(5) -0.0038(5) -0.0106(4)
S22 0.058(2) 0.0572(19) 0.079(2) 0.0004(17) -0.0102(17) -0.0181(16)
S11 0.084(2) 0.0422(18) 0.070(2) -0.0046(16) -0.0043(18) -0.0157(17)
S13 0.079(2) 0.0396(17) 0.058(2) 0.0074(15) -0.0058(17) -0.0064(16)
S24 0.070(2) 0.0471(18) 0.065(2) 0.0020(16) -0.0039(17) -0.0175(16)
S12 0.063(2) 0.0483(18) 0.075(2) 0.0005(16) -0.0189(17) -0.0123(15)
S21 0.111(3) 0.0512(19) 0.067(2) -0.0001(17) -0.0072(19) -0.0280(19)
S23 0.100(3) 0.0400(17) 0.062(2) -0.0015(16) -0.0024(18) -0.0128(17)
S14 0.067(2) 0.0447(17) 0.058(2) 0.0040(15) -0.0016(16) -0.0084(15)
N21 0.055(6) 0.038(6) 0.081(8) -0.003(5) -0.003(6) -0.013(5)
N12 0.118(10) 0.119(10) 0.073(9) 0.037(7) -0.025(7) -0.070(8)
C63 0.051(8) 0.054(7) 0.085(9) -0.001(7) -0.001(7) -0.020(6)
C43 0.068(9) 0.045(7) 0.086(9) 0.010(6) -0.033(7) -0.020(6)
N23 0.052(6) 0.036(5) 0.059(7) -0.002(5) -0.014(5) -0.010(4)
C11 0.048(7) 0.045(7) 0.046(7) -0.008(6) -0.003(6) -0.020(6)
C51 0.061(8) 0.069(8) 0.061(8) 0.001(7) -0.017(6) -0.028(7)
N24 0.070(8) 0.109(10) 0.109(9) 0.039(7) -0.021(7) -0.018(7)
C31 0.048(8) 0.071(8) 0.069(9) 0.004(7) 0.007(7) -0.010(6)
C13 0.049(7) 0.049(7) 0.035(7) 0.003(6) 0.005(6) -0.010(6)
C14 0.069(8) 0.051(7) 0.062(8) 0.000(6) -0.007(7) -0.023(7)
C53 0.042(7) 0.055(7) 0.071(8) 0.009(6) -0.026(6) -0.007(6)
C33 0.061(8) 0.046(7) 0.070(8) 0.005(6) -0.003(7) -0.026(6)
C42 0.062(8) 0.062(9) 0.091(11) 0.009(7) -0.027(7) -0.022(7)
C32 0.062(9) 0.063(8) 0.084(11) 0.016(8) -0.009(9) -0.026(7)
C22 0.040(7) 0.060(8) 0.079(10) -0.006(7) -0.019(7) -0.004(6)
C44 0.052(9) 0.063(9) 0.078(10) 0.001(7) 0.009(7) -0.024(7)
N13 0.047(6) 0.033(5) 0.066(7) -0.004(5) 0.012(5) -0.013(5)
C21 0.053(7) 0.037(7) 0.056(8) 0.007(6) -0.013(6) -0.012(6)
C24 0.083(9) 0.052(7) 0.049(8) 0.003(6) -0.014(7) -0.024(7)
C23 0.056(8) 0.022(6) 0.063(8) 0.008(6) -0.012(6) 0.000(5)
C81 0.076(10) 0.070(9) 0.100(10) 0.003(8) -0.026(8) -0.015(8)
C93 0.107(12) 0.097(10) 0.159(13) 0.027(9) -0.059(10) -0.065(9)
C73 0.058(8) 0.049(7) 0.099(9) -0.019(7) 0.009(7) -0.019(6)
C12 0.034(7) 0.074(8) 0.064(8) -0.015(7) -0.004(6) -0.031(6)
N11 0.057(6) 0.049(6) 0.054(6) 0.003(5) -0.013(5) -0.017(5)
C61 0.088(10) 0.059(8) 0.061(9) 0.008(7) -0.018(7) -0.015(7)
N22 0.089(9) 0.078(8) 0.133(11) -0.016(7) -0.035(7) -0.023(7)
C83 0.102(11) 0.038(7) 0.080(9) 0.007(6) -0.023(8) -0.033(7)
C71 0.125(12) 0.050(8) 0.132(13) 0.022(8) 0.034(10) -0.016(8)
C41 0.083(10) 0.079(9) 0.077(9) -0.019(7) -0.001(8) -0.030(8)
N14 0.154(11) 0.086(8) 0.070(8) -0.020(7) -0.007(8) -0.053(8)
C34 0.088(10) 0.075(9) 0.057(9) -0.025(8) 0.003(8) -0.044(7)
C91 0.114(13) 0.037(8) 0.232(18) -0.002(10) -0.003(12) -0.015(8)
 
_geom_special_details
;
 All esds (except the esd in the dihedral angle between two l.s. planes)
 are estimated using the full covariance matrix.  The cell esds are taken
 into account individually in the estimation of esds in distances, angles
 and torsion angles; correlations between esds in cell parameters are only
 used when they are defined by crystal symmetry.  An approximate (isotropic)
 treatment of cell esds is used for estimating esds involving l.s. planes.
;
 
loop_
 _geom_bond_atom_site_label_1
 _geom_bond_atom_site_label_2
 _geom_bond_distance
 _geom_bond_site_symmetry_2
 _geom_bond_publ_flag
Pd2 S24 2.264(3) . ?
Pd2 S14 2.268(3) . ?
Pd2 S23 2.312(3) . ?
Pd2 S13 2.312(3) . ?
Pd1 S22 2.265(3) . ?
Pd1 S12 2.282(3) . ?
Pd1 S11 2.310(3) . ?
Pd1 S21 2.322(3) . ?
S22 C22 1.723(11) . ?
S11 C11 1.683(9) . ?
S13 C13 1.679(9) . ?
S24 C24 1.735(10) . ?
S12 C12 1.724(10) . ?
S21 C21 1.688(10) . ?
S23 C23 1.679(10) . ?
S14 C14 1.726(10) . ?
N21 C21 1.296(11) . ?
N21 C81 1.495(11) . ?
N21 C31 1.497(11) . ?
N12 C32 1.101(12) . ?
C63 N13 1.484(10) . ?
C63 C73 1.529(11) . ?
C63 H63A 0.9700 . ?
C63 H63B 0.9700 . ?
C43 C53 1.516(12) . ?
C43 C33 1.520(11) . ?
C43 H43A 0.9700 . ?
C43 H43B 0.9700 . ?
N23 C23 1.310(11) . ?
N23 C83 1.462(10) . ?
N23 C33 1.470(10) . ?
C11 N11 1.307(10) . ?
C11 C21 1.514(12) . ?
C51 N11 1.487(10) . ?
C51 C41 1.507(12) . ?
C51 H51A 0.9700 . ?
C51 H51B 0.9700 . ?
N24 C44 1.120(12) . ?
C31 C41 1.512(12) . ?
C31 H31A 0.9700 . ?
C31 H31B 0.9700 . ?
C13 N13 1.321(11) . ?
C13 C23 1.517(12) . ?
C14 C24 1.393(12) . ?
C14 C44 1.473(13) . ?
C53 N13 1.488(10) . ?
C53 H53A 0.9700 . ?
C53 H53B 0.9700 . ?
C33 H33A 0.9700 . ?
C33 H33B 0.9700 . ?
C42 N22 1.150(12) . ?
C42 C12 1.430(13) . ?
C32 C22 1.470(14) . ?
C22 C12 1.365(13) . ?
C24 C34 1.431(13) . ?
C81 C91 1.480(13) . ?
C81 H81A 0.9700 . ?
C81 H81B 0.9700 . ?
C93 C83 1.516(12) . ?
C93 H93A 0.9600 . ?
C93 H93B 0.9600 . ?
C93 H93C 0.9600 . ?
C73 H73A 0.9600 . ?
C73 H73B 0.9600 . ?
C73 H73C 0.9600 . ?
N11 C61 1.509(11) . ?
C61 C71 1.482(12) . ?
C61 H61A 0.9700 . ?
C61 H61B 0.9700 . ?
C83 H83A 0.9700 . ?
C83 H83B 0.9700 . ?
C71 H71A 0.9600 . ?
C71 H71B 0.9600 . ?
C71 H71C 0.9600 . ?
C41 H41A 0.9700 . ?
C41 H41B 0.9700 . ?
N14 C34 1.130(11) . ?
C91 H91A 0.9600 . ?
C91 H91B 0.9600 . ?
C91 H91C 0.9600 . ?
 
loop_
 _geom_angle_atom_site_label_1
 _geom_angle_atom_site_label_2
 _geom_angle_atom_site_label_3
 _geom_angle
 _geom_angle_site_symmetry_1
 _geom_angle_site_symmetry_3
 _geom_angle_publ_flag
S24 Pd2 S14 90.62(10) . . ?
S24 Pd2 S23 89.24(10) . . ?
S14 Pd2 S23 176.25(12) . . ?
S24 Pd2 S13 175.74(11) . . ?
S14 Pd2 S13 90.21(10) . . ?
S23 Pd2 S13 90.20(10) . . ?
S22 Pd1 S12 90.75(11) . . ?
S22 Pd1 S11 179.02(11) . . ?
S12 Pd1 S11 90.14(11) . . ?
S22 Pd1 S21 89.49(11) . . ?
S12 Pd1 S21 179.64(13) . . ?
S11 Pd1 S21 89.62(11) . . ?
C22 S22 Pd1 101.8(4) . . ?
C11 S11 Pd1 101.8(4) . . ?
C13 S13 Pd2 99.9(4) . . ?
C24 S24 Pd2 102.8(4) . . ?
C12 S12 Pd1 101.6(4) . . ?
C21 S21 Pd1 98.9(4) . . ?
C23 S23 Pd2 100.7(3) . . ?
C14 S14 Pd2 102.7(4) . . ?
C21 N21 C81 121.6(10) . . ?
C21 N21 C31 121.8(9) . . ?
C81 N21 C31 116.6(9) . . ?
N13 C63 C73 110.2(8) . . ?
N13 C63 H63A 109.6 . . ?
C73 C63 H63A 109.6 . . ?
N13 C63 H63B 109.6 . . ?
C73 C63 H63B 109.6 . . ?
H63A C63 H63B 108.1 . . ?
C53 C43 C33 111.2(9) . . ?
C53 C43 H43A 109.4 . . ?
C33 C43 H43A 109.4 . . ?
C53 C43 H43B 109.4 . . ?
C33 C43 H43B 109.4 . . ?
H43A C43 H43B 108.0 . . ?
C23 N23 C83 120.1(9) . . ?
C23 N23 C33 122.1(8) . . ?
C83 N23 C33 117.5(9) . . ?
N11 C11 C21 118.9(9) . . ?
N11 C11 S11 123.8(8) . . ?
C21 C11 S11 117.3(8) . . ?
N11 C51 C41 114.6(9) . . ?
N11 C51 H51A 108.6 . . ?
C41 C51 H51A 108.6 . . ?
N11 C51 H51B 108.6 . . ?
C41 C51 H51B 108.6 . . ?
H51A C51 H51B 107.6 . . ?
N21 C31 C41 113.0(9) . . ?
N21 C31 H31A 109.0 . . ?
C41 C31 H31A 109.0 . . ?
N21 C31 H31B 109.0 . . ?
C41 C31 H31B 109.0 . . ?
H31A C31 H31B 107.8 . . ?
N13 C13 C23 118.4(9) . . ?
N13 C13 S13 123.9(8) . . ?
C23 C13 S13 117.6(8) . . ?
C24 C14 C44 119.1(10) . . ?
C24 C14 S14 122.2(9) . . ?
C44 C14 S14 118.5(8) . . ?
N13 C53 C43 111.3(8) . . ?
N13 C53 H53A 109.4 . . ?
C43 C53 H53A 109.4 . . ?
N13 C53 H53B 109.4 . . ?
C43 C53 H53B 109.4 . . ?
H53A C53 H53B 108.0 . . ?
N23 C33 C43 112.0(8) . . ?
N23 C33 H33A 109.2 . . ?
C43 C33 H33A 109.2 . . ?
N23 C33 H33B 109.2 . . ?
C43 C33 H33B 109.2 . . ?
H33A C33 H33B 107.9 . . ?
N22 C42 C12 178.5(13) . . ?
N12 C32 C22 177.7(16) . . ?
C12 C22 C32 120.5(11) . . ?
C12 C22 S22 123.3(9) . . ?
C32 C22 S22 116.2(9) . . ?
N24 C44 C14 175.5(14) . . ?
C13 N13 C63 121.1(9) . . ?
C13 N13 C53 121.0(8) . . ?
C63 N13 C53 117.9(9) . . ?
N21 C21 C11 118.4(9) . . ?
N21 C21 S21 125.1(8) . . ?
C11 C21 S21 116.5(8) . . ?
C14 C24 C34 119.9(10) . . ?
C14 C24 S24 121.6(9) . . ?
C34 C24 S24 118.4(8) . . ?
N23 C23 C13 118.2(9) . . ?
N23 C23 S23 125.6(8) . . ?
C13 C23 S23 116.0(8) . . ?
C91 C81 N21 113.1(9) . . ?
C91 C81 H81A 109.0 . . ?
N21 C81 H81A 109.0 . . ?
C91 C81 H81B 109.0 . . ?
N21 C81 H81B 109.0 . . ?
H81A C81 H81B 107.8 . . ?
C83 C93 H93A 109.5 . . ?
C83 C93 H93B 109.5 . . ?
H93A C93 H93B 109.5 . . ?
C83 C93 H93C 109.5 . . ?
H93A C93 H93C 109.5 . . ?
H93B C93 H93C 109.5 . . ?
C63 C73 H73A 109.5 . . ?
C63 C73 H73B 109.5 . . ?
H73A C73 H73B 109.5 . . ?
C63 C73 H73C 109.5 . . ?
H73A C73 H73C 109.5 . . ?
H73B C73 H73C 109.5 . . ?
C22 C12 C42 120.5(10) . . ?
C22 C12 S12 122.5(9) . . ?
C42 C12 S12 116.9(9) . . ?
C11 N11 C51 121.2(8) . . ?
C11 N11 C61 121.2(9) . . ?
C51 N11 C61 117.6(8) . . ?
C71 C61 N11 110.8(9) . . ?
C71 C61 H61A 109.5 . . ?
N11 C61 H61A 109.5 . . ?
C71 C61 H61B 109.5 . . ?
N11 C61 H61B 109.5 . . ?
H61A C61 H61B 108.1 . . ?
N23 C83 C93 112.7(9) . . ?
N23 C83 H83A 109.0 . . ?
C93 C83 H83A 109.0 . . ?
N23 C83 H83B 109.0 . . ?
C93 C83 H83B 109.0 . . ?
H83A C83 H83B 107.8 . . ?
C61 C71 H71A 109.5 . . ?
C61 C71 H71B 109.5 . . ?
H71A C71 H71B 109.5 . . ?
C61 C71 H71C 109.5 . . ?
H71A C71 H71C 109.5 . . ?
H71B C71 H71C 109.5 . . ?
C51 C41 C31 108.3(9) . . ?
C51 C41 H41A 110.0 . . ?
C31 C41 H41A 110.0 . . ?
C51 C41 H41B 110.0 . . ?
C31 C41 H41B 110.0 . . ?
H41A C41 H41B 108.4 . . ?
N14 C34 C24 177.9(14) . . ?
C81 C91 H91A 109.5 . . ?
C81 C91 H91B 109.5 . . ?
H91A C91 H91B 109.5 . . ?
C81 C91 H91C 109.5 . . ?
H91A C91 H91C 109.5 . . ?
H91B C91 H91C 109.5 . . ?
 
_diffrn_measured_fraction_theta_max    0.994
_diffrn_reflns_theta_full              23.31
_diffrn_measured_fraction_theta_full   0.994
_refine_diff_density_max    0.514
_refine_diff_density_min   -0.518
_refine_diff_density_rms    0.109

#END
#BEGIN

data_ptet608
 
_audit_creation_method            SHELXL-97
_chemical_name_systematic
;
 ?
;
_chemical_name_common             ?
_chemical_melting_point           ?
_chemical_formula_moiety          'C26 H32 N8 Pt2 S8'
_chemical_formula_sum
 'C26 H32 N8 Pt2 S8'
_chemical_formula_weight          1103.26
 
loop_
 _atom_type_symbol
 _atom_type_description
 _atom_type_scat_dispersion_real
 _atom_type_scat_dispersion_imag
 _atom_type_scat_source
 'C'  'C'   0.0033   0.0016
 'International Tables Vol C Tables 4.2.6.8 and 6.1.1.4'
 'H'  'H'   0.0000   0.0000
 'International Tables Vol C Tables 4.2.6.8 and 6.1.1.4'
 'N'  'N'   0.0061   0.0033
 'International Tables Vol C Tables 4.2.6.8 and 6.1.1.4'
 'S'  'S'   0.1246   0.1234
 'International Tables Vol C Tables 4.2.6.8 and 6.1.1.4'
 'Pt'  'Pt'  -1.7033   8.3905
 'International Tables Vol C Tables 4.2.6.8 and 6.1.1.4'
 
_symmetry_cell_setting            Triclinic
_symmetry_space_group_name_H-M    P-1
 
loop_
 _symmetry_equiv_pos_as_xyz
 'x, y, z'
 '-x, -y, -z'
 
_cell_length_a                    8.994(2)
_cell_length_b                    9.354(2)
_cell_length_c                    24.146(6)
_cell_angle_alpha                 89.730(4)
_cell_angle_beta                  87.220(5)
_cell_angle_gamma                 66.290(4)
_cell_volume                      1857.5(7)
_cell_formula_units_Z             2
_cell_measurement_temperature     293(2)
_cell_measurement_reflns_used     10632
_cell_measurement_theta_min       0.84
_cell_measurement_theta_max       27.20
 
_exptl_crystal_description        plate
_exptl_crystal_colour             black
_exptl_crystal_size_max           0.45
_exptl_crystal_size_mid           0.20
_exptl_crystal_size_min           0.08
_exptl_crystal_density_meas       ?
_exptl_crystal_density_diffrn     1.973
_exptl_crystal_density_method     'not measured'
_exptl_crystal_F_000              1056
_exptl_absorpt_coefficient_mu     8.003
_exptl_absorpt_correction_type    multi-scan
_exptl_absorpt_correction_T_min   0.481
_exptl_absorpt_correction_T_max   1.000
_exptl_absorpt_process_details    'SADABS'
 
_exptl_special_details
;
 ?
;
 
_diffrn_ambient_temperature       293(2)
_diffrn_radiation_wavelength      0.71073
_diffrn_radiation_type            MoK\a
_diffrn_radiation_source          'fine-focus sealed tube'
_diffrn_radiation_monochromator   graphite
_diffrn_measurement_device_type   'Bruker Smart 1000 CCD'
_diffrn_measurement_method        'theta & omega scan'
_diffrn_detector_area_resol_mean  ?
_diffrn_standards_number          ?
_diffrn_standards_interval_count  ?
_diffrn_standards_interval_time   ?
_diffrn_standards_decay_%         none
_diffrn_reflns_number             21833
_diffrn_reflns_av_R_equivalents   0.0760
_diffrn_reflns_av_sigmaI/netI     0.0699
_diffrn_reflns_limit_h_min        -11
_diffrn_reflns_limit_h_max        11
_diffrn_reflns_limit_k_min        -12
_diffrn_reflns_limit_k_max        11
_diffrn_reflns_limit_l_min        -30
_diffrn_reflns_limit_l_max        30
_diffrn_reflns_theta_min          0.84
_diffrn_reflns_theta_max          27.20
_reflns_number_total              8132
_reflns_number_gt                 5527
_reflns_threshold_expression      >2sigma(I)
 
_computing_data_collection        'Smart'
_computing_cell_refinement        'Saint'
_computing_data_reduction         'Saint'
_computing_structure_solution     'Sir97'
_computing_structure_refinement   'SHELXL-97 (Sheldrick, 1997)'
_computing_molecular_graphics     ?
_computing_publication_material   ?
 
_refine_special_details
;
 Refinement of F^2^ against ALL reflections.  The weighted R-factor wR and
 goodness of fit S are based on F^2^, conventional R-factors R are based
 on F, with F set to zero for negative F^2^. The threshold expression of
 F^2^ > 2sigma(F^2^) is used only for calculating R-factors(gt) etc. and is
 not relevant to the choice of reflections for refinement.  R-factors based
 on F^2^ are statistically about twice as large as those based on F, and R-
 factors based on ALL data will be even larger.
;
 
_refine_ls_structure_factor_coef  Fsqd
_refine_ls_matrix_type            full
_refine_ls_weighting_scheme       calc
_refine_ls_weighting_details
 'calc w=1/[\s^2^(Fo^2^)+(0.0295P)^2^+0.0000P] where P=(Fo^2^+2Fc^2^)/3'
_atom_sites_solution_primary      direct
_atom_sites_solution_secondary    difmap
_atom_sites_solution_hydrogens    geom
_refine_ls_hydrogen_treatment     constr
_refine_ls_extinction_method      none
_refine_ls_extinction_coef        ?
_refine_ls_number_reflns          8132
_refine_ls_number_parameters      401
_refine_ls_number_restraints      0
_refine_ls_R_factor_all           0.0694
_refine_ls_R_factor_gt            0.0431
_refine_ls_wR_factor_ref          0.0857
_refine_ls_wR_factor_gt           0.0793
_refine_ls_goodness_of_fit_ref    1.004
_refine_ls_restrained_S_all       1.004
_refine_ls_shift/su_max           0.001
_refine_ls_shift/su_mean          0.000
 
loop_
 _atom_site_label
 _atom_site_type_symbol
 _atom_site_fract_x
 _atom_site_fract_y
 _atom_site_fract_z
 _atom_site_U_iso_or_equiv
 _atom_site_adp_type
 _atom_site_occupancy
 _atom_site_symmetry_multiplicity
 _atom_site_calc_flag
 _atom_site_refinement_flags
 _atom_site_disorder_assembly
 _atom_site_disorder_group
Pt2 Pt 0.06036(3) 0.20240(3) 0.198953(11) 0.04915(9) Uani 1 1 d . . .
Pt1 Pt 0.56849(3) 0.41139(3) 0.303638(11) 0.05370(9) Uani 1 1 d . . .
S22 S 0.6483(2) 0.2841(2) 0.38400(8) 0.0612(5) Uani 1 1 d . . .
S11 S 0.4823(2) 0.5364(2) 0.22163(8) 0.0666(5) Uani 1 1 d . . .
S13 S 0.0333(2) 0.33075(19) 0.28269(7) 0.0617(5) Uani 1 1 d . . .
S24 S 0.1108(2) 0.0750(2) 0.11635(8) 0.0590(4) Uani 1 1 d . . .
S12 S 0.5728(2) 0.6326(2) 0.34023(8) 0.0638(5) Uani 1 1 d . . .
S21 S 0.5700(3) 0.1855(2) 0.26511(8) 0.0715(5) Uani 1 1 d . . .
S23 S 0.1817(3) -0.0332(2) 0.24284(8) 0.0690(5) Uani 1 1 d . . .
S14 S -0.0790(2) 0.4311(2) 0.15729(7) 0.0592(4) Uani 1 1 d . . .
N21 N 0.6533(6) 0.1251(6) 0.1574(2) 0.0550(14) Uani 1 1 d . . .
N12 N 0.7582(9) 0.3461(9) 0.5227(3) 0.093(2) Uani 1 1 d . . .
C63 C 0.2087(8) 0.3562(7) 0.3836(3) 0.0576(18) Uani 1 1 d . . .
H63A H 0.2063 0.4183 0.3511 0.069 Uiso 1 1 calc R . .
H63B H 0.3032 0.3455 0.4038 0.069 Uiso 1 1 calc R . .
C43 C 0.2292(8) 0.0050(8) 0.4367(3) 0.0659(19) Uani 1 1 d . . .
H43A H 0.1920 0.0717 0.4696 0.079 Uiso 1 1 calc R . .
H43B H 0.2969 -0.0997 0.4482 0.079 Uiso 1 1 calc R . .
N23 N 0.1223(6) -0.0578(6) 0.3511(2) 0.0486(12) Uani 1 1 d . . .
C11 C 0.4737(7) 0.3912(8) 0.1809(3) 0.0523(16) Uani 1 1 d . . .
C51 C 0.3631(7) 0.2954(8) 0.1067(3) 0.0595(18) Uani 1 1 d . . .
H51A H 0.2698 0.3395 0.0839 0.071 Uiso 1 1 calc R . .
H51B H 0.3423 0.2259 0.1329 0.071 Uiso 1 1 calc R . .
N24 N -0.2221(8) 0.5889(9) 0.0208(3) 0.088(2) Uani 1 1 d . . .
C31 C 0.6642(8) 0.1717(9) 0.1004(3) 0.067(2) Uani 1 1 d . . .
H31A H 0.7551 0.0898 0.0808 0.080 Uiso 1 1 calc R . .
H31B H 0.6859 0.2652 0.1002 0.080 Uiso 1 1 calc R . .
C13 C 0.1423(7) 0.1850(7) 0.3240(3) 0.0466(15) Uani 1 1 d . . .
C14 C -0.0625(7) 0.3752(8) 0.0876(3) 0.0497(15) Uani 1 1 d . . .
C53 C 0.3275(8) 0.0652(8) 0.3978(3) 0.0617(19) Uani 1 1 d . . .
H53A H 0.3992 0.0953 0.4192 0.074 Uiso 1 1 calc R . .
H53B H 0.3944 -0.0179 0.3722 0.074 Uiso 1 1 calc R . .
C33 C 0.0837(8) 0.0030(8) 0.4077(3) 0.0587(17) Uani 1 1 d . . .
H33A H 0.0390 -0.0603 0.4289 0.070 Uiso 1 1 calc R . .
H33B H 0.0005 0.1085 0.4073 0.070 Uiso 1 1 calc R . .
C42 C 0.6441(8) 0.6910(9) 0.4430(3) 0.069(2) Uani 1 1 d . . .
C32 C 0.7128(9) 0.3850(9) 0.4800(4) 0.067(2) Uani 1 1 d . . .
C22 C 0.6584(7) 0.4307(9) 0.4262(3) 0.0577(17) Uani 1 1 d . . .
C44 C -0.1489(8) 0.4942(9) 0.0502(3) 0.0632(19) Uani 1 1 d . . .
N13 N 0.2228(6) 0.2005(6) 0.3661(2) 0.0502(13) Uani 1 1 d . . .
C21 C 0.5706(7) 0.2283(8) 0.1964(3) 0.0500(16) Uani 1 1 d . . .
C24 C 0.0211(8) 0.2232(8) 0.0704(3) 0.0542(17) Uani 1 1 d . . .
C23 C 0.1502(7) 0.0247(7) 0.3107(3) 0.0517(16) Uani 1 1 d . . .
C81 C 0.7449(9) -0.0400(8) 0.1715(4) 0.079(2) Uani 1 1 d . . .
H81A H 0.7881 -0.0458 0.2078 0.094 Uiso 1 1 calc R . .
H81B H 0.8358 -0.0874 0.1448 0.094 Uiso 1 1 calc R . .
C93 C -0.0565(10) -0.1935(10) 0.3324(4) 0.095(3) Uani 1 1 d . . .
H93A H -0.1238 -0.1393 0.3642 0.143 Uiso 1 1 calc R . .
H93B H -0.0585 -0.2949 0.3291 0.143 Uiso 1 1 calc R . .
H93C H -0.0968 -0.1351 0.2996 0.143 Uiso 1 1 calc R . .
C73 C 0.0582(8) 0.4383(8) 0.4197(3) 0.070(2) Uani 1 1 d . . .
H73A H -0.0356 0.4509 0.3995 0.105 Uiso 1 1 calc R . .
H73B H 0.0525 0.5390 0.4306 0.105 Uiso 1 1 calc R . .
H73C H 0.0609 0.3776 0.4521 0.105 Uiso 1 1 calc R . .
C12 C 0.6267(8) 0.5757(8) 0.4083(3) 0.0589(18) Uani 1 1 d . . .
N11 N 0.3822(6) 0.4232(6) 0.1375(2) 0.0544(14) Uani 1 1 d . . .
C61 C 0.2860(9) 0.5851(9) 0.1205(3) 0.074(2) Uani 1 1 d . . .
H61A H 0.2551 0.6537 0.1528 0.089 Uiso 1 1 calc R . .
H61B H 0.1872 0.5901 0.1044 0.089 Uiso 1 1 calc R . .
N22 N 0.6579(9) 0.7838(9) 0.4698(3) 0.103(3) Uani 1 1 d . . .
C83 C 0.1174(8) -0.2113(7) 0.3395(3) 0.0643(19) Uani 1 1 d . . .
H83A H 0.1628 -0.2811 0.3699 0.077 Uiso 1 1 calc R . .
H83B H 0.1832 -0.2571 0.3060 0.077 Uiso 1 1 calc R . .
C71 C 0.3791(12) 0.6401(10) 0.0793(4) 0.112(3) Uani 1 1 d . . .
H71A H 0.4774 0.6343 0.0949 0.168 Uiso 1 1 calc R . .
H71B H 0.3143 0.7462 0.0699 0.168 Uiso 1 1 calc R . .
H71C H 0.4055 0.5752 0.0465 0.168 Uiso 1 1 calc R . .
C41 C 0.5117(8) 0.2029(9) 0.0702(3) 0.0650(19) Uani 1 1 d . . .
H41A H 0.5125 0.2606 0.0368 0.078 Uiso 1 1 calc R . .
H41B H 0.5082 0.1046 0.0594 0.078 Uiso 1 1 calc R . .
N14 N 0.0431(10) 0.1539(9) -0.0324(3) 0.101(2) Uani 1 1 d . . .
C34 C 0.0342(9) 0.1840(9) 0.0129(4) 0.072(2) Uani 1 1 d . . .
C91 C 0.6396(13) -0.1273(10) 0.1713(5) 0.131(4) Uani 1 1 d . . .
H91A H 0.5470 -0.0776 0.1964 0.196 Uiso 1 1 calc R . .
H91B H 0.6998 -0.2325 0.1827 0.196 Uiso 1 1 calc R . .
H91C H 0.6037 -0.1284 0.1346 0.196 Uiso 1 1 calc R . .
 
loop_
 _atom_site_aniso_label
 _atom_site_aniso_U_11
 _atom_site_aniso_U_22
 _atom_site_aniso_U_33
 _atom_site_aniso_U_23
 _atom_site_aniso_U_13
 _atom_site_aniso_U_12
Pt2 0.05528(16) 0.04366(15) 0.04619(17) 0.00288(11) -0.00151(12) -0.01761(12)
Pt1 0.05109(16) 0.05069(16) 0.05542(19) -0.00052(12) -0.00803(12) -0.01581(12)
S22 0.0596(10) 0.0609(11) 0.0666(13) 0.0082(9) -0.0165(9) -0.0264(9)
S11 0.0857(13) 0.0471(10) 0.0618(12) 0.0001(9) -0.0139(10) -0.0201(9)
S13 0.0856(13) 0.0384(9) 0.0482(11) 0.0037(7) -0.0049(9) -0.0114(9)
S24 0.0742(11) 0.0473(10) 0.0565(11) -0.0016(8) -0.0076(9) -0.0249(9)
S12 0.0696(11) 0.0509(10) 0.0656(13) 0.0024(9) -0.0207(9) -0.0168(9)
S21 0.1072(15) 0.0516(11) 0.0547(12) 0.0065(9) -0.0137(10) -0.0297(11)
S23 0.1033(15) 0.0401(9) 0.0539(12) 0.0008(8) -0.0045(10) -0.0187(10)
S14 0.0633(11) 0.0511(10) 0.0494(11) 0.0024(8) -0.0004(8) -0.0091(8)
N21 0.050(3) 0.046(3) 0.064(4) -0.004(3) -0.007(3) -0.014(3)
N12 0.115(6) 0.102(6) 0.081(6) 0.025(4) -0.032(5) -0.062(5)
C63 0.054(4) 0.054(4) 0.072(5) -0.001(3) 0.000(3) -0.029(3)
C43 0.077(5) 0.061(4) 0.066(5) 0.016(4) -0.026(4) -0.031(4)
N23 0.055(3) 0.042(3) 0.048(3) 0.007(2) -0.011(3) -0.018(3)
C11 0.043(4) 0.055(4) 0.058(4) 0.005(3) 0.000(3) -0.019(3)
C51 0.052(4) 0.068(5) 0.066(5) 0.007(4) -0.014(3) -0.031(4)
N24 0.087(5) 0.092(5) 0.076(5) 0.029(4) -0.022(4) -0.025(4)
C31 0.062(4) 0.067(5) 0.065(5) -0.007(4) 0.012(4) -0.023(4)
C13 0.046(3) 0.040(3) 0.046(4) -0.007(3) 0.007(3) -0.010(3)
C14 0.044(3) 0.061(4) 0.050(4) 0.007(3) -0.003(3) -0.026(3)
C53 0.055(4) 0.056(4) 0.071(5) 0.007(4) -0.021(4) -0.017(3)
C33 0.062(4) 0.059(4) 0.054(5) 0.013(3) -0.002(3) -0.023(4)
C42 0.055(4) 0.071(5) 0.068(5) 0.001(4) -0.017(4) -0.012(4)
C32 0.059(4) 0.080(5) 0.068(6) 0.012(4) -0.018(4) -0.030(4)
C22 0.046(4) 0.074(5) 0.052(4) 0.001(4) -0.009(3) -0.022(4)
C44 0.059(4) 0.073(5) 0.060(5) 0.012(4) -0.008(4) -0.029(4)
N13 0.049(3) 0.045(3) 0.058(4) -0.002(3) -0.003(3) -0.020(3)
C21 0.054(4) 0.055(4) 0.047(4) 0.005(3) -0.007(3) -0.028(3)
C24 0.063(4) 0.061(4) 0.048(4) 0.000(3) -0.008(3) -0.034(4)
C23 0.050(4) 0.038(3) 0.060(5) 0.007(3) -0.008(3) -0.010(3)
C81 0.085(5) 0.045(4) 0.078(6) -0.003(4) -0.003(4) 0.003(4)
C93 0.101(6) 0.100(7) 0.115(8) 0.030(6) -0.045(6) -0.068(6)
C73 0.073(5) 0.070(5) 0.069(5) -0.018(4) 0.006(4) -0.033(4)
C12 0.050(4) 0.062(5) 0.061(5) -0.005(4) -0.015(3) -0.017(3)
N11 0.046(3) 0.051(3) 0.063(4) 0.006(3) -0.008(3) -0.016(3)
C61 0.076(5) 0.063(5) 0.069(6) 0.009(4) -0.023(4) -0.011(4)
N22 0.123(6) 0.085(5) 0.097(6) -0.017(5) -0.045(5) -0.033(5)
C83 0.068(4) 0.041(4) 0.080(5) 0.022(3) -0.023(4) -0.015(3)
C71 0.127(8) 0.066(6) 0.135(10) 0.023(6) 0.011(7) -0.033(6)
C41 0.074(5) 0.074(5) 0.050(5) -0.003(4) -0.006(4) -0.033(4)
N14 0.161(7) 0.093(5) 0.061(5) -0.018(4) -0.005(5) -0.064(5)
C34 0.072(5) 0.077(5) 0.069(6) -0.011(4) -0.003(4) -0.032(4)
C91 0.140(9) 0.048(5) 0.195(13) 0.009(6) -0.013(8) -0.027(6)
 
_geom_special_details
;
 All esds (except the esd in the dihedral angle between two l.s. planes)
 are estimated using the full covariance matrix.  The cell esds are taken
 into account individually in the estimation of esds in distances, angles
 and torsion angles; correlations between esds in cell parameters are only
 used when they are defined by crystal symmetry.  An approximate (isotropic)
 treatment of cell esds is used for estimating esds involving l.s. planes.
;
 
loop_
 _geom_bond_atom_site_label_1
 _geom_bond_atom_site_label_2
 _geom_bond_distance
 _geom_bond_site_symmetry_2
 _geom_bond_publ_flag
Pt2 S24 2.2592(19) . ?
Pt2 S14 2.2596(18) . ?
Pt2 S23 2.3081(18) . ?
Pt2 S13 2.3085(18) . ?
Pt1 S22 2.2635(19) . ?
Pt1 S12 2.2688(18) . ?
Pt1 S11 2.299(2) . ?
Pt1 S21 2.3078(19) . ?
S22 C22 1.746(7) . ?
S11 C11 1.709(7) . ?
S13 C13 1.680(6) . ?
S24 C24 1.725(7) . ?
S12 C12 1.756(7) . ?
S21 C21 1.704(7) . ?
S23 C23 1.701(7) . ?
S14 C14 1.747(7) . ?
N21 C21 1.317(8) . ?
N21 C31 1.452(9) . ?
N21 C81 1.476(8) . ?
N12 C32 1.131(9) . ?
C63 N13 1.473(8) . ?
C63 C73 1.495(9) . ?
C63 H63A 0.9700 . ?
C63 H63B 0.9700 . ?
C43 C53 1.515(10) . ?
C43 C33 1.521(8) . ?
C43 H43A 0.9700 . ?
C43 H43B 0.9700 . ?
N23 C23 1.317(8) . ?
N23 C33 1.455(8) . ?
N23 C83 1.482(8) . ?
C11 N11 1.322(8) . ?
C11 C21 1.477(9) . ?
C51 N11 1.483(8) . ?
C51 C41 1.508(9) . ?
C51 H51A 0.9700 . ?
C51 H51B 0.9700 . ?
N24 C44 1.137(9) . ?
C31 C41 1.508(9) . ?
C31 H31A 0.9700 . ?
C31 H31B 0.9700 . ?
C13 N13 1.317(8) . ?
C13 C23 1.507(8) . ?
C14 C24 1.369(9) . ?
C14 C44 1.422(9) . ?
C53 N13 1.476(8) . ?
C53 H53A 0.9700 . ?
C53 H53B 0.9700 . ?
C33 H33A 0.9700 . ?
C33 H33B 0.9700 . ?
C42 N22 1.135(9) . ?
C42 C12 1.430(10) . ?
C32 C22 1.413(10) . ?
C22 C12 1.343(9) . ?
C24 C34 1.425(10) . ?
C81 C91 1.478(11) . ?
C81 H81A 0.9700 . ?
C81 H81B 0.9700 . ?
C93 C83 1.523(9) . ?
C93 H93A 0.9600 . ?
C93 H93B 0.9600 . ?
C93 H93C 0.9600 . ?
C73 H73A 0.9600 . ?
C73 H73B 0.9600 . ?
C73 H73C 0.9600 . ?
N11 C61 1.479(8) . ?
C61 C71 1.488(11) . ?
C61 H61A 0.9700 . ?
C61 H61B 0.9700 . ?
C83 H83A 0.9700 . ?
C83 H83B 0.9700 . ?
C71 H71A 0.9600 . ?
C71 H71B 0.9600 . ?
C71 H71C 0.9600 . ?
C41 H41A 0.9700 . ?
C41 H41B 0.9700 . ?
N14 C34 1.122(10) . ?
C91 H91A 0.9600 . ?
C91 H91B 0.9600 . ?
C91 H91C 0.9600 . ?
 
loop_
 _geom_angle_atom_site_label_1
 _geom_angle_atom_site_label_2
 _geom_angle_atom_site_label_3
 _geom_angle
 _geom_angle_site_symmetry_1
 _geom_angle_site_symmetry_3
 _geom_angle_publ_flag
S24 Pt2 S14 90.41(7) . . ?
S24 Pt2 S23 89.83(7) . . ?
S14 Pt2 S23 175.08(7) . . ?
S24 Pt2 S13 174.69(7) . . ?
S14 Pt2 S13 90.78(6) . . ?
S23 Pt2 S13 89.43(6) . . ?
S22 Pt1 S12 91.05(7) . . ?
S22 Pt1 S11 178.18(6) . . ?
S12 Pt1 S11 90.42(7) . . ?
S22 Pt1 S21 89.35(7) . . ?
S12 Pt1 S21 178.56(8) . . ?
S11 Pt1 S21 89.21(7) . . ?
C22 S22 Pt1 101.9(3) . . ?
C11 S11 Pt1 102.6(2) . . ?
C13 S13 Pt2 102.3(2) . . ?
C24 S24 Pt2 103.0(2) . . ?
C12 S12 Pt1 101.6(2) . . ?
C21 S21 Pt1 100.4(2) . . ?
C23 S23 Pt2 101.4(2) . . ?
C14 S14 Pt2 102.6(2) . . ?
C21 N21 C31 121.2(6) . . ?
C21 N21 C81 120.4(6) . . ?
C31 N21 C81 118.3(6) . . ?
N13 C63 C73 111.4(5) . . ?
N13 C63 H63A 109.4 . . ?
C73 C63 H63A 109.4 . . ?
N13 C63 H63B 109.4 . . ?
C73 C63 H63B 109.4 . . ?
H63A C63 H63B 108.0 . . ?
C53 C43 C33 109.9(6) . . ?
C53 C43 H43A 109.7 . . ?
C33 C43 H43A 109.7 . . ?
C53 C43 H43B 109.7 . . ?
C33 C43 H43B 109.7 . . ?
H43A C43 H43B 108.2 . . ?
C23 N23 C33 121.4(5) . . ?
C23 N23 C83 120.9(6) . . ?
C33 N23 C83 117.6(5) . . ?
N11 C11 C21 121.1(6) . . ?
N11 C11 S11 121.4(5) . . ?
C21 C11 S11 117.5(5) . . ?
N11 C51 C41 112.2(5) . . ?
N11 C51 H51A 109.2 . . ?
C41 C51 H51A 109.2 . . ?
N11 C51 H51B 109.2 . . ?
C41 C51 H51B 109.2 . . ?
H51A C51 H51B 107.9 . . ?
N21 C31 C41 113.0(6) . . ?
N21 C31 H31A 109.0 . . ?
C41 C31 H31A 109.0 . . ?
N21 C31 H31B 109.0 . . ?
C41 C31 H31B 109.0 . . ?
H31A C31 H31B 107.8 . . ?
N13 C13 C23 118.3(5) . . ?
N13 C13 S13 124.8(5) . . ?
C23 C13 S13 116.9(5) . . ?
C24 C14 C44 121.8(7) . . ?
C24 C14 S14 121.7(5) . . ?
C44 C14 S14 116.3(5) . . ?
N13 C53 C43 112.1(5) . . ?
N13 C53 H53A 109.2 . . ?
C43 C53 H53A 109.2 . . ?
N13 C53 H53B 109.2 . . ?
C43 C53 H53B 109.2 . . ?
H53A C53 H53B 107.9 . . ?
N23 C33 C43 113.7(6) . . ?
N23 C33 H33A 108.8 . . ?
C43 C33 H33A 108.8 . . ?
N23 C33 H33B 108.8 . . ?
C43 C33 H33B 108.8 . . ?
H33A C33 H33B 107.7 . . ?
N22 C42 C12 179.0(9) . . ?
N12 C32 C22 178.8(10) . . ?
C12 C22 C32 121.2(7) . . ?
C12 C22 S22 122.9(6) . . ?
C32 C22 S22 115.7(6) . . ?
N24 C44 C14 177.9(8) . . ?
C13 N13 C63 120.5(5) . . ?
C13 N13 C53 122.0(5) . . ?
C63 N13 C53 117.5(5) . . ?
N21 C21 C11 119.3(6) . . ?
N21 C21 S21 123.6(5) . . ?
C11 C21 S21 117.1(5) . . ?
C14 C24 C34 119.6(7) . . ?
C14 C24 S24 122.2(5) . . ?
C34 C24 S24 118.2(6) . . ?
N23 C23 C13 118.8(6) . . ?
N23 C23 S23 123.8(5) . . ?
C13 C23 S23 117.3(5) . . ?
N21 C81 C91 110.9(7) . . ?
N21 C81 H81A 109.5 . . ?
C91 C81 H81A 109.5 . . ?
N21 C81 H81B 109.5 . . ?
C91 C81 H81B 109.5 . . ?
H81A C81 H81B 108.0 . . ?
C83 C93 H93A 109.5 . . ?
C83 C93 H93B 109.5 . . ?
H93A C93 H93B 109.5 . . ?
C83 C93 H93C 109.5 . . ?
H93A C93 H93C 109.5 . . ?
H93B C93 H93C 109.5 . . ?
C63 C73 H73A 109.5 . . ?
C63 C73 H73B 109.5 . . ?
H73A C73 H73B 109.5 . . ?
C63 C73 H73C 109.5 . . ?
H73A C73 H73C 109.5 . . ?
H73B C73 H73C 109.5 . . ?
C22 C12 C42 121.6(7) . . ?
C22 C12 S12 122.5(5) . . ?
C42 C12 S12 115.8(6) . . ?
C11 N11 C61 122.3(6) . . ?
C11 N11 C51 120.1(5) . . ?
C61 N11 C51 117.4(5) . . ?
N11 C61 C71 111.7(7) . . ?
N11 C61 H61A 109.3 . . ?
C71 C61 H61A 109.3 . . ?
N11 C61 H61B 109.3 . . ?
C71 C61 H61B 109.3 . . ?
H61A C61 H61B 107.9 . . ?
N23 C83 C93 110.8(6) . . ?
N23 C83 H83A 109.5 . . ?
C93 C83 H83A 109.5 . . ?
N23 C83 H83B 109.5 . . ?
C93 C83 H83B 109.5 . . ?
H83A C83 H83B 108.1 . . ?
C61 C71 H71A 109.5 . . ?
C61 C71 H71B 109.5 . . ?
H71A C71 H71B 109.5 . . ?
C61 C71 H71C 109.5 . . ?
H71A C71 H71C 109.5 . . ?
H71B C71 H71C 109.5 . . ?
C51 C41 C31 110.5(6) . . ?
C51 C41 H41A 109.6 . . ?
C31 C41 H41A 109.6 . . ?
C51 C41 H41B 109.6 . . ?
C31 C41 H41B 109.6 . . ?
H41A C41 H41B 108.1 . . ?
N14 C34 C24 179.4(10) . . ?
C81 C91 H91A 109.5 . . ?
C81 C91 H91B 109.5 . . ?
H91A C91 H91B 109.5 . . ?
C81 C91 H91C 109.5 . . ?
H91A C91 H91C 109.5 . . ?
H91B C91 H91C 109.5 . . ?
 
_diffrn_measured_fraction_theta_max    0.982
_diffrn_reflns_theta_full              27.20
_diffrn_measured_fraction_theta_full   0.982
_refine_diff_density_max    1.940
_refine_diff_density_min   -1.051
_refine_diff_density_rms    0.157

#END
